# Supplementary material for: Total cavopulmonary connection with a new restorative vascular graft: results at 2 years
Source: PubMed Central journal article supplement — J Thorac Dis. 2020 Aug;12(8):4168–73. doi: 10.21037/jtd-19-739 (PMC7475567; doi:10.21037/jtd-19-739), 2020-08
Supplement: jtd-12-08-4168-dss.pdf [file jtd-12-08-4168-dss.pdf]

## Data Sharing Statement

|                     |                                                                                                                                                    |                                                                                                                                                                              |
|---------------------|----------------------------------------------------------------------------------------------------------------------------------------------------|------------------------------------------------------------------------------------------------------------------------------------------------------------------------------|
| <b>Article Info</b> | <a href="http://dx.doi.org/10.21037/jtd-19-739">http://dx.doi.org/10.21037/jtd-19-739</a>                                                          |                                                                                                                                                                              |
| <b>Item</b>         | <b>Question</b>                                                                                                                                    | <b>Authors' Response<br/>(place "-" if not applicable)</b>                                                                                                                   |
| 1                   | Would you like to share data collected for your study to others?                                                                                   | Yes                                                                                                                                                                          |
| 2                   | If not, would you like to share the reason for your decision?                                                                                      | -                                                                                                                                                                            |
| 3                   | What data in particular will be shared?                                                                                                            | In-life imaging data will be shared. We would like to see if more information can be extracted on growth and remodeling of the novel conduit by more advanced image analysis |
| 4                   | Any other documents will be share? Such as study protocol, statistical analysis plan, informed consent form, clinical study report, analytic code. | Statistical analysis plan, informed consent form, and clinical study report will also be shared if requested                                                                 |
| 5                   | When will data availability begin?                                                                                                                 | From the publication date                                                                                                                                                    |
| 6                   | When will data availability end?                                                                                                                   | Five years since publication date                                                                                                                                            |
| 7                   | To whom will you share the data?                                                                                                                   | To experts on in vivo image analysis                                                                                                                                         |
| 8                   | For what type of analysis or purpose?                                                                                                              | To extract more information on growth and remodeling of the novel conduit with time                                                                                          |
| 9                   | How or where can the data/documents be obtained?                                                                                                   | By email conversation with the corresponding author                                                                                                                          |
| 10                  | Any other restrictions?                                                                                                                            | We may balance potential benefit and risk of each request. Interested researchers will be required to sign a non-disclosure agreement before data can be shared.             |
